# Supplementary material for: Knowledge, attitude and practice of antibiotics and their determinants in Eritrea: an urban population-based survey
Source: HighWire-hosted journal article supplement (doi:10.1136/bmjopen-2020-046432), 2021-09-01
Supplement: bmjopen-2020-046432supp005_data_supplement.pdf [file bmjopen-2020-046432supp005_data_supplement.pdf]

## **Knowledge, Attitude and Practice of Antibiotics and their Determinants in Eritrea: Urban Population-based Survey**

Mulugeta Russom<sup>1</sup>, Merhawi Bahta<sup>1\*</sup>, Merhawi Debesai<sup>1</sup>, Iyassu Bahta<sup>1</sup>, Abrahalei Kesse<sup>1</sup>, Aziza Afendi<sup>1</sup>, Yodit Fitsum<sup>1</sup>, Josephina Nambozi<sup>2</sup>, Soliana Kidane<sup>2</sup>, Eyasu H. Tesfamariam<sup>3</sup>

<sup>1</sup>National Medicines and Food Administration, Ministry of Health, Asmara, Eritrea.

<sup>2</sup>WHO Country Office, Asmara, Eritrea.

<sup>3</sup>Biostatistics and Epidemiology Unit, Department of Statistics, College of Science, Eritrean Institute Technology, Mainefhi, Eritrea.

\*Correspondence: Merhawi Bahta, National Medicines and Food Administration, Ministry of Health, e-mail: [meramcp19@gmail.com](mailto:meramcp19@gmail.com), Tel: +291-7294279, Postal address:212, Asmara, Eritrea.

Supplementary file 5: Comparison of attitude scores on antibiotics and antibiotic resistance across the categories of demographic characteristics at bivariate level, Eritrea, 2019.

| Characteristics          | Mean (SD)    | F/t Value | p-value | p-value trend (Type of trend) | Post Hoc Test        |                           |
|--------------------------|--------------|-----------|---------|-------------------------------|----------------------|---------------------------|
|                          |              |           |         |                               | Pair wise comparison | Group wise comparison     |
| <b>Age</b>               |              |           |         |                               |                      |                           |
| 24 or less <b>A</b>      | 22.10 (3.81) |           |         |                               |                      |                           |
| 25 to 34 <b>B</b>        | 22.50 (3.31) |           |         |                               |                      |                           |
| 35 to 44 <b>C</b>        | 22.25 (3.66) | 2.97*     | 0.019   | 0.034 (quadratic)             | A=B=C=D=E,           | Group 1: A, B, C, D and E |
| 45 to 54 <b>D</b>        | 22.80 (3.47) |           |         |                               |                      |                           |
| 55 and above <b>E</b>    | 22.07 (3.76) |           |         |                               |                      |                           |
| <b>Gender</b>            |              |           |         |                               |                      |                           |
| Male                     | 23.0 (3.86)  |           |         |                               |                      |                           |
| Female                   | 22.13 (3.48) | 4.92      | <0.0001 | -                             | M>F                  | -                         |
| <b>Religion</b>          |              |           |         |                               |                      |                           |
| Christian                | 22.37 (3.54) |           |         |                               |                      |                           |
| Muslim                   | 22.24 (3.80) | 0.7       | 0.488   | -                             | -                    | -                         |
| <b>Educational Level</b> |              |           |         |                               |                      |                           |
| Illiterate               | 21.36 (3.64) |           |         |                               |                      |                           |
| Primary                  | 22.14 (3.46) |           |         |                               | I=P, I<M, I<S,       | Group 1: I                |
| Middle                   | 22.34 (3.65) | 10.76     | <0.0001 | <0.0001 (linear)              | I<H, P=M, P=S,       | Group 2: P, S and M       |
| Secondary                | 22.32 (3.52) |           |         |                               | P<H, M=S,            |                           |
| Higher                   | 23.16 (3.62) |           |         |                               | M<H, S<H             | Group 3:H                 |
| <b>Family Size</b>       |              |           |         |                               |                      |                           |
| One                      | 21.86 (3.42) |           |         |                               |                      |                           |
| Two to three             | 22.25 (3.46) | 1.2       | 0.300   | -                             | -                    | -                         |
| Four or more             | 22.39 (3.64) |           |         |                               |                      |                           |
| <b>Occupation</b>        |              |           |         |                               |                      |                           |
| Governmental             | 22.93 (3.73) |           |         |                               | G=P, G=H,            |                           |
| Private employee         | 22.04 (3.32) |           |         |                               | G=Se, G>U,           |                           |
| House wife               | 22.30 (3.51) |           |         |                               | G=St, G=F,           |                           |
| Self-employed            | 22.62 (3.48) |           |         |                               | G=O, P=H,            |                           |
| Unemployed               | 21.69 (3.38) |           |         |                               | P=Se, P=U, P=U,      | Group 1:F, U,             |
| Student                  | 21.82 (3.85) | 4.95      | <0.0001 | -                             | P=St, P=O,           | St, O, H, G, and Se       |
| Farmer/Fisher            | 21.65 (3.92) |           |         |                               | H=Se, H=U,           |                           |
|                          |              |           |         |                               | H=St, H=F, H=O,      |                           |
|                          |              |           |         |                               | Se=U, Se=St,         |                           |
|                          |              |           |         |                               | Se=F, Se=O,          |                           |
|                          |              |           |         |                               | U=St, U=F, U=O,      |                           |
|                          |              |           |         |                               | St=F, St=O, F=O      |                           |
| <b>Zone</b>              |              |           |         |                               |                      |                           |
| Anseba                   | 23.19 (3.43) |           |         |                               | A=De, A=G,           |                           |
| Debub                    | 22.27 (3.35) |           |         |                               | A>M, A=S,            | Group 1: A,               |
| Gash Barka               | 23.24 (3.73) |           |         |                               | A=D, De=M,           | De, M, S, and D           |
| Maekel                   | 22.01 (3.62) | 8.87      | <0.0001 | -                             | De<G, De=S,          | Group 2: A,               |
| SKB                      | 22.76 (3.20) |           |         |                               | De=D, G>M,           | De, M, S, and G           |
| DKB                      | 21.73 (4.32) |           |         |                               | G=S, G=D, M=S,       |                           |
|                          |              |           |         |                               | M=D, S=D             |                           |

\* Welch test statistic was used to obtain robust result; SKB: Semenawi Keih Bahri; DKB: Debubawi Keih Bahri.
